# Supplementary material
Source: publisher figshare collection journal article supplement (https://acs.figshare.com/ndownloader/files/4039873)
Supplement: Supplementary file 1 [file 4039873]

## Supporting Information:

### Characterization of Water Confined between Silica Surfaces Using the Resonance Shear Measurement

Motohiro Kasuya<sup>1</sup>, Masaya Hino<sup>1</sup>, Hisho Yamada<sup>1</sup>, Masashi Mizukami<sup>1</sup>, Hiroyuki Mori<sup>2</sup>, Seiji Kajita<sup>2</sup>, Toshihide Ohmori<sup>2</sup>, Atsushi Suzuki<sup>3</sup>, and Kazue Kurihara<sup>1,4</sup>

1 Institute of Multidisciplinary Research for Advanced Materials, Tohoku University, Sendai, 980-8577, Japan

2 Japan Toyota Central R&D Laboratories, Inc., Nagakute, Aichi 480-1192, Japan

3 TOYOTA Motor Co., Toyota, Aichi, 471-8572, Japan

Tokiwadai, Hodogaya-ku, Yokohama 240-8501, Japan.

4 WPI-Advanced Institute for Material Research, Tohoku University, 2-1-1, Katahira, Aoba-ku, Sendai, 980-8577, Japan  
kurihara@tagen.tohoku.ac.jp

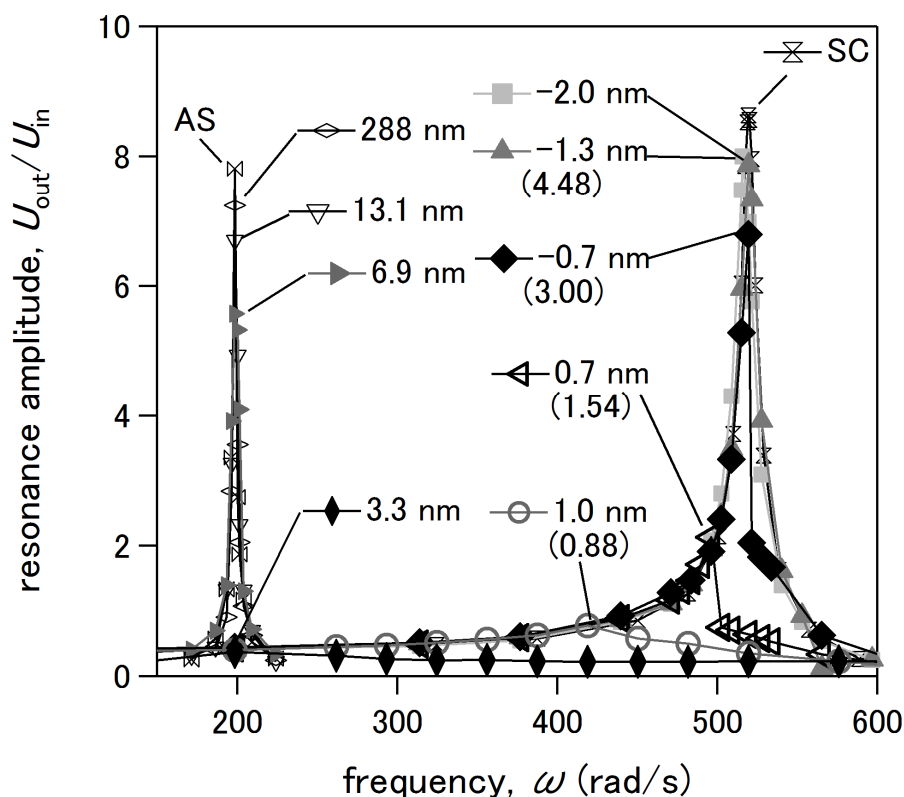

**Figure. S1.** Resonance curves obtained from water confined between untreated silica surfaces at various separation distances,  $D'$ . Dry contact between the silica surfaces was defined as “zero” of separation, to determine the distance  $D'$ . Number in parentheses indicated vertical load  $L$  (mN). Two reference states the curves for the separation in air (AS) and silica-silica contact (SC) are also plotted for convince.

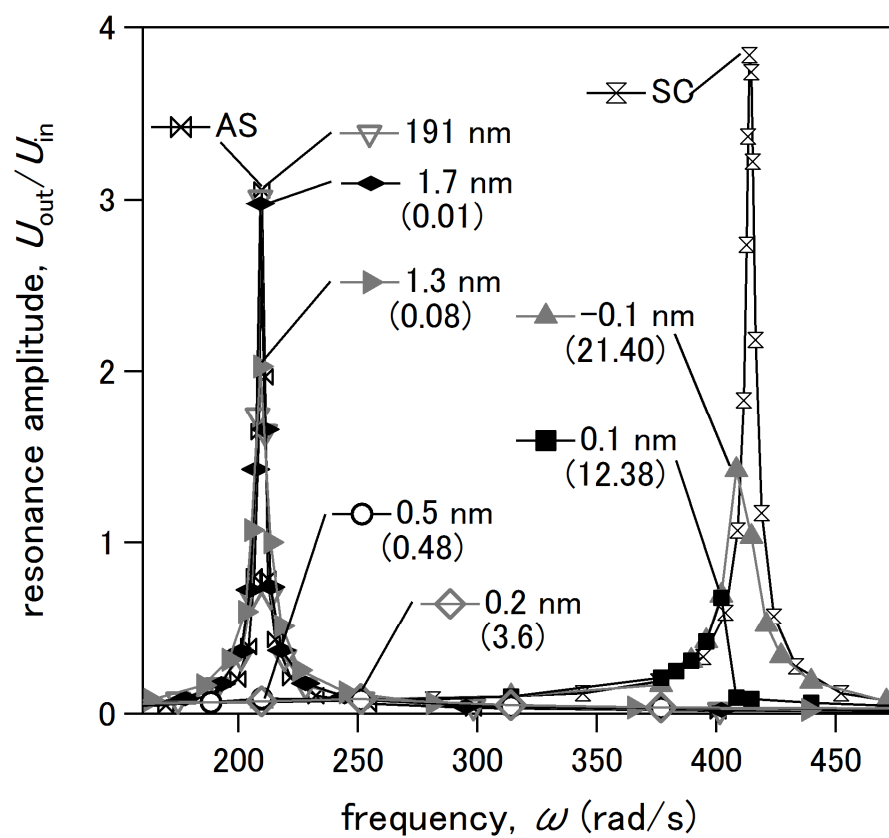

**Figure. S2.** Resonance curves obtained from water confined between untreated silica surfaces at various separation distances,  $D'$ . Dry contact between the silica surfaces was defined as “zero” of separation, to determine the distance  $D'$ . Number in parentheses indicated vertical load  $L$  (mN).

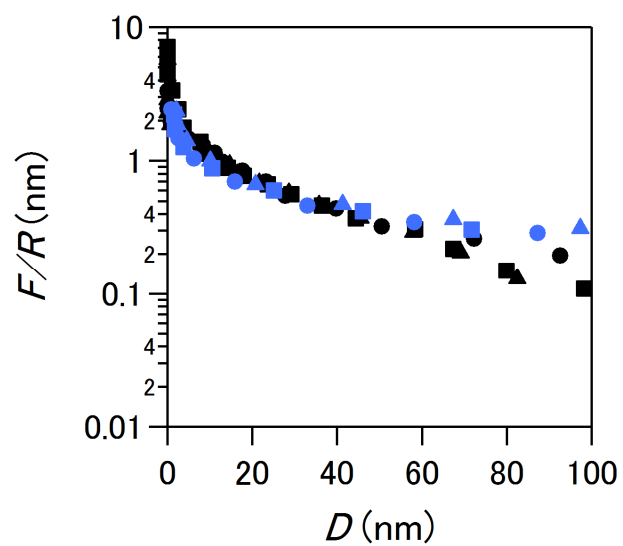

**Figure. S3.** Surface forces profiles between silica surfaces in water. Black and Blue points were the profiles for the untreated and the plasma-treated silica.
